# Supplementary material for: Whole-genome analyses of human adenovirus type 55 emerged in Tibet, Sichuan and Yunnan in China, in 2016
Source: PubMed Central journal article supplement (PMC5730161; doi:10.1371/journal.pone.0189625), 2017-12-14

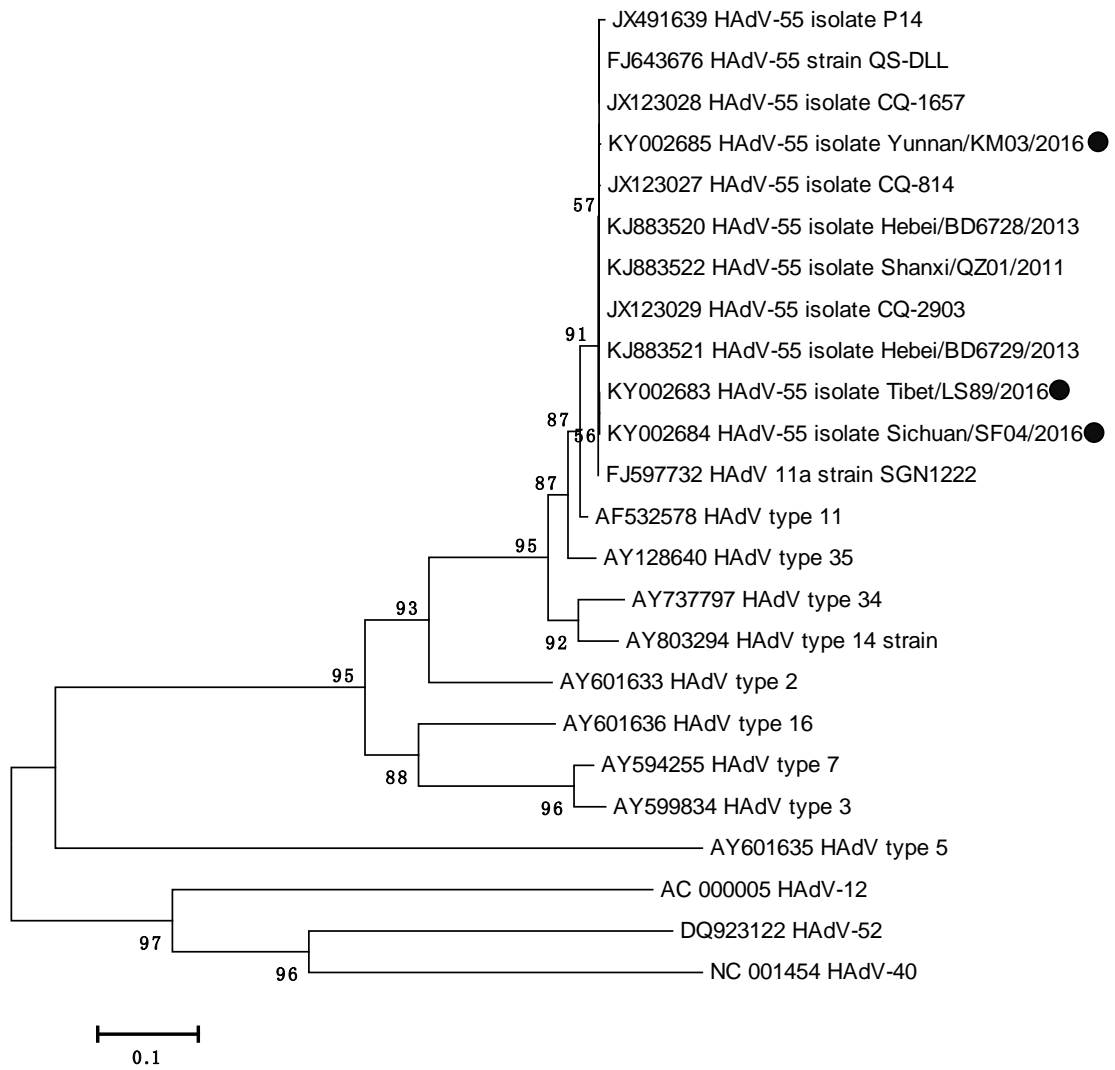

Supplement: pone.0189625.s001.pdf [file pone.0189625.s001.pdf]
