# Supplementary material for: Whole-genome analyses of human adenovirus type 55 emerged in Tibet, Sichuan and Yunnan in China, in 2016
Source: PubMed Central journal article supplement (PMC5730161; doi:10.1371/journal.pone.0189625), 2017-12-14
Supplement: pone.0189625.s003.pdf [file pone.0189625.s003.pdf]

---

| <b>Primers</b> | <b>Sequences (5'to 3')</b> |
|----------------|----------------------------|
| 1-160F         | TTTGGGGGTGGAGTGTTTTTGC     |
| 1-3340R        | AGTGCGGGCAATAACCAAATGAT    |
| 2-2973F        | ATTTGCGGTGCTTCCGATGAG      |
| 2-5860R        | GGACCCCAAGTTCACGTGAAATAC   |
| 3-5690F        | GGAGTGCCTCGGTCTTCTTCGT     |
| 3-9050R        | TCTGGGCGATGTCAGCGAAAT      |
| 4-8930F        | CATCACACCTGAGCGAGGTT       |
| 4-12320R       | ATCAGTCTCAACGCACTCAAAAAGT  |
| 5-12120F       | CAGATGAGGCCGGACTGGTATAC    |
| 5-14910R       | GTGACATCTGAGGTGGTGAGCAAT   |
| 6-14760F       | CGATGTATCTGGAGGAACGGAC     |
| 6-18210R       | AAGTAACTCAGCGTCGACGCAC     |
| 7-18109F       | TGCTTTTAATTAATATGGAGTAGC   |
| 7-21516R       | AGGAACATGCAGCAGAAAAGT      |
| 8-21319F       | TTCTAACACCTGCTACCTTTTTGAT  |
| 8-24287R       | ACAGCGGGGTATGCAAAGTGT      |
| 9-24097F       | CTTGGAAGAGGTTCCAAAAATCT    |
| 9-26876R       | TGGATACCTCTGCCTCTGATTAC    |
| 10-26636F      | TACTTTTGGAACAGTCAGCTCTTAC  |
| 10-29862R      | TTTCTAAGGTGTTCTGGTGGAGTA   |
| 11-29667F      | CAACTTCTAGACTGGATCCTTGTG   |
| 11-33192R      | TCTTCCCTCTCCTCTCCTGCT      |
| 12-32904F      | AACCTTGTGATAATGGAGTTGCTTC  |
| 12-34621R      | GTTGCAAGTTAAGCGGATGTGAC    |

---
