# Supplementary material for: Whole-genome analyses of human adenovirus type 55 emerged in Tibet, Sichuan and Yunnan in China, in 2016
Source: PubMed Central journal article supplement (PMC5730161; doi:10.1371/journal.pone.0189625), 2017-12-14
Supplement: pone.0189625.s004.pdf [file pone.0189625.s004.pdf]

| <b>HAdV strains</b>               | <b>GenBank accession number</b> |
|-----------------------------------|---------------------------------|
| HAdV-2                            | AY601633                        |
| HAdV-3                            | AY599834                        |
| HAdV-5                            | AY601635                        |
| HAdV-7                            | AY594255                        |
| HAdV-11                           | AF532578                        |
| HAdV-12                           | AC 000005                       |
| HAdV-14                           | AY803294                        |
| HAdV-16                           | AY601636                        |
| HAdV-34                           | AY737797                        |
| HAdV-35                           | AY128640                        |
| HAdV-40                           | NC 001454                       |
| HAdV-52                           | DQ923122                        |
| HAdV-11a strain SGN1222           | FJ597732                        |
| HAdV-55 strain QS-DLL             | FJ643676                        |
| HAdV-55 isolate CQ-814            | JX123027                        |
| HAdV-55 isolate CQ-1657           | JX123028                        |
| HAdV-55 isolate CQ-2903           | JX123029                        |
| HAdV-55 isolate P14               | JX491639                        |
| HAdV-55 isolate Hebei/BD6728/2013 | KJ883520                        |
| HAdV-55 isolate Shanxi/QZ01/2011  | KJ883522                        |
| HAdV-55 isolate Hebei/BD6729/2013 | KJ883521                        |
| HAdV-55 isolate LS89/Tibet/2016   | KY002683                        |
| HAdV-55 isolate SF04/SC/2016      | KY002684                        |
| HAdV-55 isolate KM03/YN/2016      | KY002685                        |
